# Supplementary material for: Contrasting potential for biological N 2 fixation at three polluted central European Sphagnum peat bogs: combining the 15 N 2 -tracer and natural-abundance isotope approaches
Source: Copernicus journal article supplement (doi:10.5194/soil-9-623-2023), 2023-12-22
Supplement: Supplementary file 1 [file soil-9-623-2023-supplement.pdf]

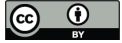

*Supplement of*

**Contrasting potential for biological N<sub>2</sub> fixation at three polluted central European *Sphagnum* peat bogs: combining the <sup>15</sup>N<sub>2</sub>-tracer and natural-abundance isotope approaches**

**Marketa Stepanova et al.**

*Correspondence to:* Martin Novak ([martin.novak2@geology.cz](mailto:martin.novak2@geology.cz))

The copyright of individual parts of the supplement might differ from the article licence.

**Supplement:**

**Fig. S1.** Boxplots of  $\delta^{15}\text{N}$  values of various forms of atmospheric  $\text{N}_r$  deposition. Different letters mark statistically different sample types ( $p < 0.05$ ).

**Fig. S2.** Fluctuations of water table level at BRU and UHL.

**Fig. S3.** Schematic sketch suggesting a strategy for testing whether a discrepancy between  $\delta^{15}\text{N}$  values of atmospheric deposition and living *Sphagnum* can be related to biological  $\text{N}_2$ -fixation. The vertical axis shows randomly selected numbers of  $\delta^{15}\text{N}$  observations. Simplified from Novak et al. (2019).

**Table S1.** Nitrogen concentration and  $\delta^{15}\text{N}$  values of living *Sphagnum* samples.

**Table S2.** Concentrations and isotope composition of liquid  $\text{N}_r$  forms.

**Table S3.** Comparison of concentrations of major chemical species in atmospheric deposition, surface runoff and bog water at the study sites. N : P ratios of atmospheric input are based on vertical wet deposition. Data from October 2018.

**Table S4.** Chemical characteristics and  $\delta^{15}\text{N}$  values of peat core samples.

**Table S5.** Rates of biological  $\text{N}_2$ -fixation (BNF) in pristine and polluted *Sphagnum* bogs compiled from recent literature. ARA – acetylene reduction assay.

**Supplement.** Methodology of chemical analysis of liquid and solid samples.

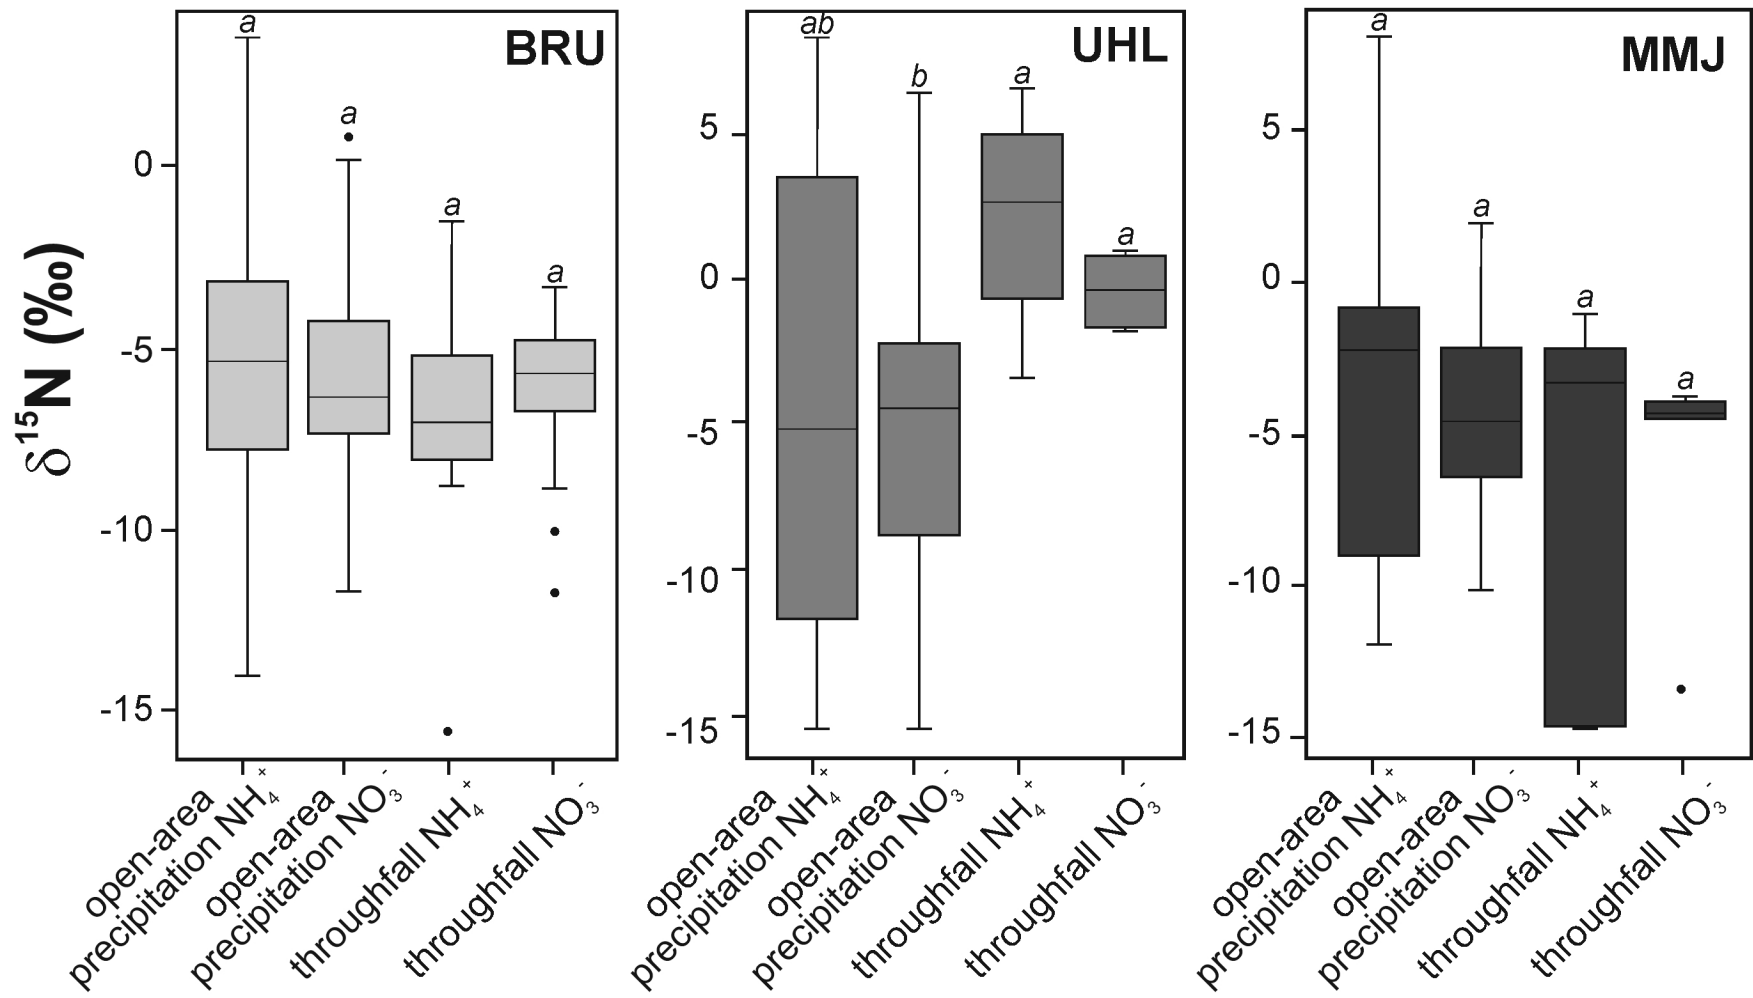

**Fig. S1**

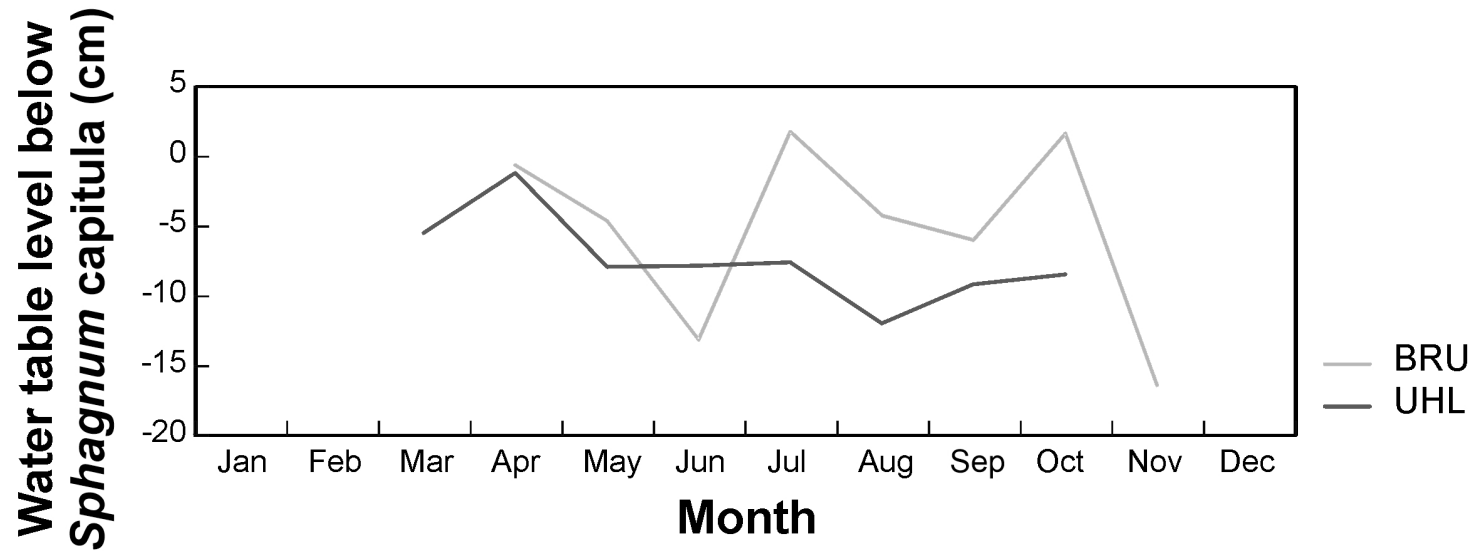

**Fig. S2**

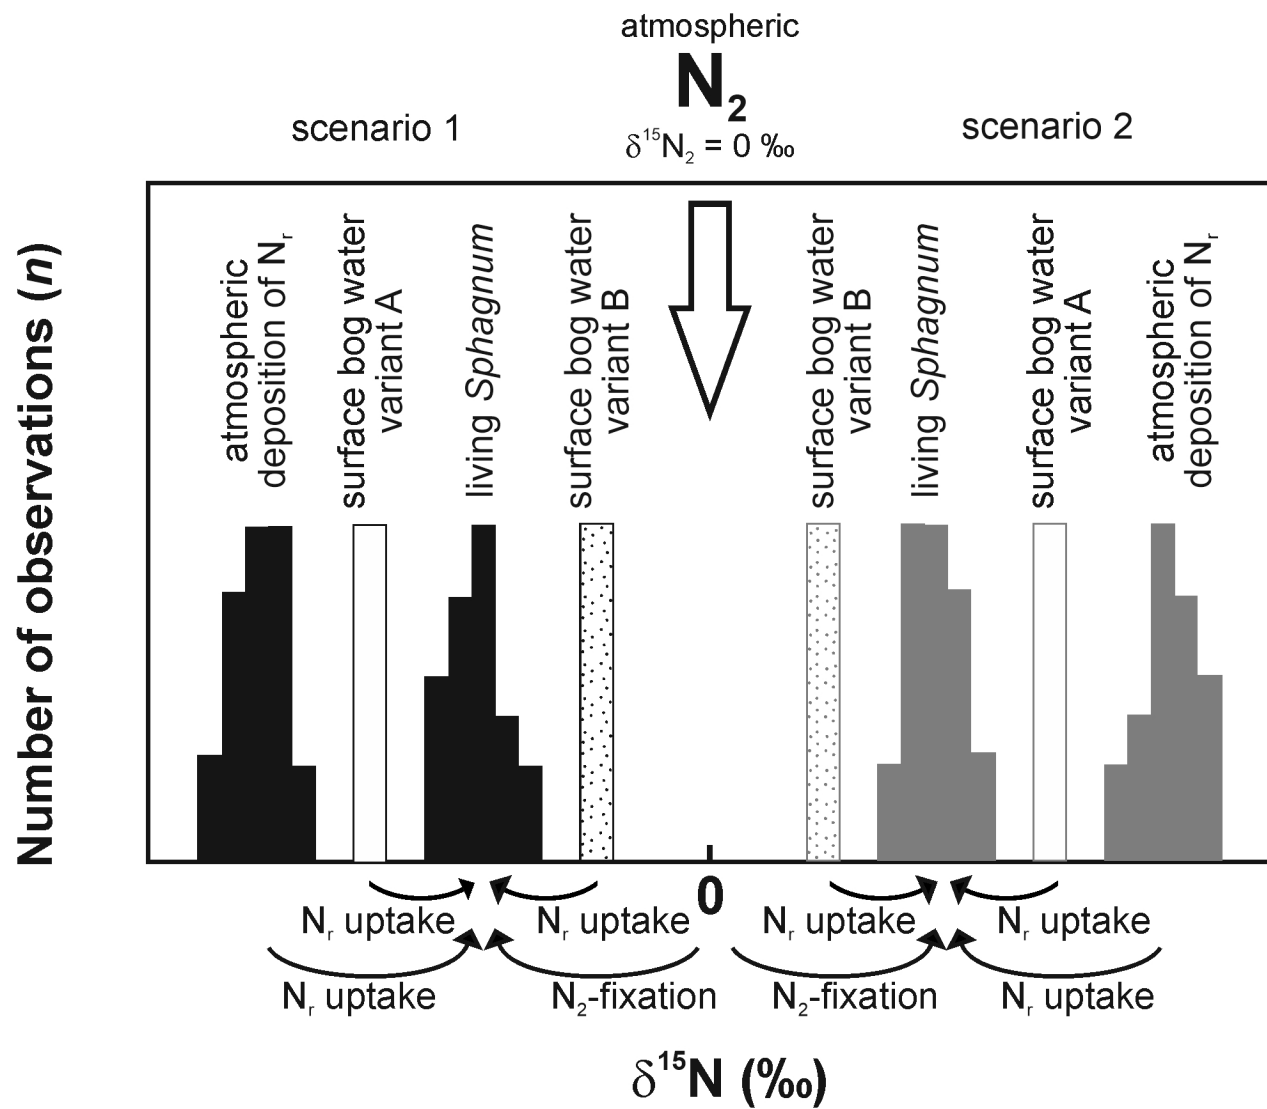

**Fig. S3**

Table S1. Nitrogen concentration and  $\delta^{15}\text{N}$  values of living *Sphagnum* samples.

| Site | Sample I.D. | <i>Sphagnum</i> species                 | N (%) | $\delta^{15}\text{N}$ (‰) |
|------|-------------|-----------------------------------------|-------|---------------------------|
| BRU  | BRU 1       | <i>Sphagnum cuspidatum</i> Ehrh.        | 1.0   | -1.9                      |
|      | BRU 2       | <i>Sphagnum magellanicum</i> Brid.      | 0.9   | -4.6                      |
|      | BRU 3       | <i>Sphagnum cuspidatum</i> Ehrh.        | 1.0   | -3.3                      |
|      | BRU 4       | <i>Sphagnum magellanicum</i> Brid.      | 0.8   | -4.2                      |
|      | BRU 5       | <i>Sphagnum papillosum</i> Lindb.       | 1.0   | -3.3                      |
|      | BRU 6       | <i>Sphagnum rubellum</i> Wils.          | 0.8   | -4.7                      |
|      | BRU 7       | <i>Sphagnum cuspidatum</i> Ehrh.        | 0.9   | -3.6                      |
|      | BRU 8       | <i>Sphagnum cuspidatum</i> Ehrh.        | 1.0   | -3.7                      |
|      | BRU 9       | <i>Sphagnum cuspidatum</i> Ehrh.        | 1.0   | -4.1                      |
|      | BRU 10      | <i>Sphagnum rubellum</i> Wils.          | 0.7   | -5.7                      |
|      | BRU 11      | <i>Sphagnum magellanicum</i> Brid.      | 0.8   | -6.0                      |
|      | BRU 12      | <i>Sphagnum papillosum</i> Lindb.       | 0.8   | -4.1                      |
| UHL  | UHL 1       | <i>Sphagnum girgensohnii</i> Russow     | 0.9   | -5.6                      |
|      | UHL 2       | <i>Sphagnum russowii</i> Warnst.        | 0.6   | -4.6                      |
|      | UHL 3       | <i>Sphagnum girgensohnii</i> Russow     | 0.8   | -3.4                      |
|      | UHL 4       | <i>Sphagnum girgensohnii</i> Russow     | 1.0   | -4.3                      |
|      | UHL 5       | <i>Sphagnum girgensohnii</i> Russow     | 0.8   | -6.0                      |
|      | UHL 6       | <i>Sphagnum girgensohnii</i> Russow     | 0.7   | -4.2                      |
|      | UHL 7       | <i>Sphagnum russowii</i> Warnst.        | 0.7   | -3.8                      |
|      | UHL 8       | <i>Sphagnum russowii</i> Warnst.        | 0.6   | -4.2                      |
|      | UHL 9       | <i>Sphagnum girgensohnii</i> Russow     | 1.1   | -3.7                      |
|      | UHL 10      | <i>Sphagnum girgensohnii</i> Russow     | 1.2   | -5.1                      |
|      | UHL 11      | <i>Sphagnum russowii</i> Warnst.        | 0.7   | -4.6                      |
|      | UHL 12      | <i>Sphagnum nemoreum</i> Scop.          | 0.6   | -4.1                      |
| MMJ  | MMJ 1       | <i>Sphagnum girgensohnii</i> Russow     | 1.1   | -5.2                      |
|      | MMJ 2       | <i>Sphagnum flexuosum</i> Dozy et Molk. | 1.6   | -3.4                      |
|      | MMJ 3       | <i>Sphagnum flexuosum</i> Dozy et Molk. | 1.8   | -2.6                      |
|      | MMJ 4       | <i>Sphagnum girgensohnii</i> Russow     | 1.1   | -4.5                      |
|      | MMJ 5       | <i>Sphagnum girgensohnii</i> Russow     | 1.0   | -4.5                      |
|      | MMJ 6       | <i>Sphagnum girgensohnii</i> Russow     | 1.6   | -5.9                      |
|      | MMJ 7       | <i>Sphagnum girgensohnii</i> Russow     | 1.5   | -6.2                      |
|      | MMJ 8       | <i>Sphagnum girgensohnii</i> Russow     | 1.3   | -6.0                      |
|      | MMJ 9       | <i>Sphagnum girgensohnii</i> Russow     | 0.9   | -4.7                      |
|      | MMJ 10      | <i>Sphagnum girgensohnii</i> Russow     | 0.9   | -5.3                      |
|      | MMJ 11      | <i>Sphagnum girgensohnii</i> Russow     | 1.6   | -4.7                      |
|      | MMJ 12      | <i>Sphagnum girgensohnii</i> Russow     | 1.1   | -5.0                      |

Table S2. Concentrations and isotope composition of liquid N<sub>r</sub> forms (n.d. – not determined).

| Site          | Date              | Sample type                | [NH <sub>4</sub> <sup>+</sup> -N]<br>(mg L <sup>-1</sup> ) | [NO <sub>3</sub> <sup>-</sup> -N]<br>(mg L <sup>-1</sup> ) | δ <sup>15</sup> NH <sub>4</sub> <sup>+</sup> -N<br>(‰) | δ <sup>15</sup> NO <sub>3</sub> <sup>-</sup> -N<br>(‰) |      |
|---------------|-------------------|----------------------------|------------------------------------------------------------|------------------------------------------------------------|--------------------------------------------------------|--------------------------------------------------------|------|
| BRU           | January 25, 2016  | open-area<br>precipitation | 1.6                                                        | 4.0                                                        | -9.1                                                   | -6.7                                                   |      |
|               | February 9, 2016  |                            | 0.6                                                        | 4.4                                                        | -7.8                                                   | -2.7                                                   |      |
|               | March 9, 2016     |                            | 0.7                                                        | 0.4                                                        | -9.2                                                   | -7.3                                                   |      |
|               | April 6, 2016     |                            | 1.6                                                        | 3.1                                                        | -1.9                                                   | -2.6                                                   |      |
|               | May 10, 2016      |                            | 1.7                                                        | 0.4                                                        | -2.4                                                   | -7.8                                                   |      |
|               | June 9, 2016      |                            | 0.1                                                        | 0.5                                                        | -3.0                                                   | -6.3                                                   |      |
|               | July 13, 2016     |                            | 0.2                                                        | 0.6                                                        | -4.0                                                   | 0.8                                                    |      |
|               | August 4, 2016    |                            | 0.8                                                        | 0.5                                                        | -3.8                                                   | -6.7                                                   |      |
|               | September 6, 2016 |                            | 0.5                                                        | 0.4                                                        | -5.9                                                   | -7.8                                                   |      |
|               | October 6, 2016   |                            | 0.1                                                        | 0.4                                                        | -3.1                                                   | 0.2                                                    |      |
|               | November 7, 2016  |                            | 0.2                                                        | 1.0                                                        | -4.2                                                   | -7.4                                                   |      |
|               | December 6, 2016  |                            | 0.2                                                        | 1.0                                                        | -4.9                                                   | -7.3                                                   |      |
|               | January 9, 2017   |                            | 0.3                                                        | 2.2                                                        | -8.9                                                   | -8.9                                                   |      |
|               | February 8, 2017  |                            | 0.5                                                        | 3.5                                                        | -7.8                                                   | -5.1                                                   |      |
|               | March 8, 2017     |                            | 0.4                                                        | 3.1                                                        | -14.0                                                  | -11.7                                                  |      |
|               | April 6, 2017     |                            | 1.4                                                        | 7.1                                                        | -8.3                                                   | -6.3                                                   |      |
|               | May 15, 2017      |                            | 1.3                                                        | 3.0                                                        | -5.6                                                   | -8.2                                                   |      |
|               | June 8, 2017      |                            | 1.6                                                        | 0.4                                                        | 0.4                                                    | -5.0                                                   |      |
|               | July 11, 2017     |                            | 0.6                                                        | 0.9                                                        | 0.3                                                    | -2.4                                                   |      |
|               | August 7, 2017    |                            | 0.1                                                        | 0.5                                                        | -6.3                                                   | -7.4                                                   |      |
|               | September 6, 2017 |                            | 0.2                                                        | 0.4                                                        | -3.1                                                   | -6.4                                                   |      |
|               | October 17, 2017  |                            | 0.1                                                        | 3.5                                                        | 3.5                                                    | -4.2                                                   |      |
|               | November 7, 2017  |                            | 0.2                                                        | 3.5                                                        | -5.2                                                   | -7.2                                                   |      |
|               | December 6, 2017  | 0.2                        | 1.8                                                        | -7.4                                                       | -5.6                                                   |                                                        |      |
|               | January 9, 2018   | 0.3                        | 3.5                                                        | -7.0                                                       | -6.1                                                   |                                                        |      |
|               | February 7, 2018  | 0.0                        | 3.1                                                        | -6.0                                                       | -2.3                                                   |                                                        |      |
|               | November 7, 2016  | throughfall                | 0.1                                                        | 1.2                                                        | -4.0                                                   | -6.0                                                   |      |
|               | December 6, 2016  |                            | 0.1                                                        | 0.7                                                        | -4.5                                                   | -4.8                                                   |      |
|               | January 9, 2017   |                            | 0.1                                                        | 4.0                                                        | -8.6                                                   | -4.8                                                   |      |
|               | February 8, 2017  |                            | 0.3                                                        | 4.0                                                        | -8.2                                                   | -3.7                                                   |      |
|               | March 8, 2017     |                            | 0.4                                                        | 3.1                                                        | -15.5                                                  | -11.7                                                  |      |
|               | April 6, 2017     |                            | 0.8                                                        | 9.7                                                        | -6.6                                                   | -4.0                                                   |      |
|               | May 15, 2017      |                            | 1.2                                                        | 4.0                                                        | -7.8                                                   | -5.3                                                   |      |
|               | June 8, 2017      |                            | 0.6                                                        | 1.0                                                        | -3.1                                                   | -8.9                                                   |      |
|               | July 11, 2017     |                            | 0.3                                                        | 1.4                                                        | -8.8                                                   | -10                                                    |      |
|               | August 7, 2017    |                            | 0.5                                                        | 3.1                                                        | -1.5                                                   | -6.0                                                   |      |
|               | September 6, 2017 |                            | 1.3                                                        | 4.4                                                        | -7.9                                                   | -6.4                                                   |      |
|               | October 17, 2017  |                            | 0.4                                                        | 0.9                                                        | -7.2                                                   | -6.7                                                   |      |
|               | November 7, 2017  |                            | 0.2                                                        | 0.9                                                        | -7.2                                                   | -6.7                                                   |      |
|               | December 6, 2017  |                            | 0.3                                                        | 3.5                                                        | -5.9                                                   | -5.0                                                   |      |
|               | January 9, 2018   |                            | 0.3                                                        | 1.8                                                        | -6.9                                                   | -5.3                                                   |      |
|               | February 7, 2018  |                            | 0.0                                                        | 3.1                                                        | -5.9                                                   | -3.3                                                   |      |
|               | March 9, 2016     |                            | runoff                                                     | 0.1                                                        | 0.4                                                    | 0.5                                                    | -1.2 |
|               | April 6, 2016     |                            |                                                            | 0.0                                                        | 3.5                                                    | -3.0                                                   | -4.6 |
|               | May 10, 2016      |                            |                                                            | 0.3                                                        | 0.4                                                    | 3.3                                                    | -2.4 |
|               | June 9, 2016      |                            |                                                            | 0.3                                                        | 3.0                                                    | 1.2                                                    | -2.9 |
| July 13, 2016 | 0.3               |                            |                                                            | 0.1                                                        | 0.6                                                    | 0.7                                                    |      |

| Site | Date               | Sample type             | [NH <sub>4</sub> <sup>+</sup> -N]<br>(mg L <sup>-1</sup> ) | [NO <sub>3</sub> <sup>-</sup> -N]<br>(mg L <sup>-1</sup> ) | δ <sup>15</sup> NH <sub>4</sub> <sup>+</sup> -N<br>(‰) | δ <sup>15</sup> NO <sub>3</sub> <sup>-</sup> -N<br>(‰) |
|------|--------------------|-------------------------|------------------------------------------------------------|------------------------------------------------------------|--------------------------------------------------------|--------------------------------------------------------|
|      | August 4, 2016     |                         | 0.1                                                        | 4.0                                                        | -5.1                                                   | -3.9                                                   |
|      | September 6, 2016  |                         | 0.1                                                        | 0.4                                                        | 1.1                                                    | -2.5                                                   |
|      | October 6, 2016    |                         | 0.1                                                        | 7.0                                                        | -8.4                                                   | -8.3                                                   |
|      | November 7, 2016   |                         | 0.1                                                        | 1.0                                                        | 0.2                                                    | -1.6                                                   |
|      | December 6, 2016   |                         | 0.1                                                        | 0.8                                                        | 1.0                                                    | -0.6                                                   |
|      | January 9, 2017    |                         | 0.1                                                        | 2.2                                                        | 1.0                                                    | -1.5                                                   |
|      | February 8, 2017   |                         | 0.2                                                        | 3.5                                                        | -9.2                                                   | -2.3                                                   |
|      | March 8, 2017      |                         | 0.1                                                        | 3.1                                                        | -11.1                                                  | -2.4                                                   |
|      | April 6, 2017      |                         | 0.4                                                        | 7.1                                                        | -3.4                                                   | -7.0                                                   |
|      | May 15, 2017       |                         | 0.3                                                        | 2.7                                                        | -1.0                                                   | -5.5                                                   |
|      | June 8, 2017       |                         | 0.3                                                        | 0.4                                                        | -4.0                                                   | -4.0                                                   |
|      | July 11, 2017      |                         | 0.1                                                        | 0.4                                                        | -8.3                                                   | -5.2                                                   |
|      | August 7, 2017     |                         | 0.2                                                        | 0.7                                                        | -1.0                                                   | -3.5                                                   |
|      | September 6, 2017  |                         | 0.2                                                        | 0.9                                                        | 1.7                                                    | -1.6                                                   |
|      | October 17, 2017   |                         | 0.1                                                        | 4.9                                                        | -2.7                                                   | -3.2                                                   |
|      | November 7, 2017   |                         | 0.2                                                        | 4.9                                                        | 2.1                                                    | -1.4                                                   |
|      | December 6, 2017   |                         | 0.0                                                        | 1.3                                                        | -2.0                                                   | -3.1                                                   |
|      | January 9, 2018    |                         | 0.1                                                        | 1.8                                                        | -6.2                                                   | -5.6                                                   |
|      | February 7, 2018   |                         | 1.3                                                        | 1.3                                                        | -2.9                                                   | -2.9                                                   |
|      | June 17, 2019      |                         | 0.1                                                        | 0.2                                                        | -2.5                                                   | -1.8                                                   |
|      | June 17, 2019      | bog water               | 0.4                                                        | 0.2                                                        | 5.3                                                    | -0.04                                                  |
|      | June 17, 2019      |                         | n.d.                                                       | n.d.                                                       | n.d.                                                   | n.d.                                                   |
|      | June 17, 2019      |                         | 0.1                                                        | 0.0                                                        | -1.7                                                   | 1.2                                                    |
|      | June 17, 2019      |                         | 1.3                                                        | 0.1                                                        | 2.2                                                    | 1.4                                                    |
|      | June 17, 2019      |                         | 0.8                                                        | 0.6                                                        | -0.8                                                   | -0.2                                                   |
|      |                    | open-area precipitation |                                                            |                                                            |                                                        |                                                        |
| UHL  | February 2, 2016   |                         | 0.6                                                        | 4.9                                                        | -9.4                                                   | -4.0                                                   |
|      | March 2, 2016      |                         | 0.9                                                        | 0.4                                                        | -9.9                                                   | -8.9                                                   |
|      | April 6, 2016      |                         | 1.6                                                        | 1.8                                                        | -9.9                                                   | -6.5                                                   |
|      | April 30, 2016     |                         | 0.8                                                        | 1.8                                                        | -10.2                                                  | -10.1                                                  |
|      | May 30, 2016       |                         | 0.9                                                        | 0.4                                                        | -8.1                                                   | -10.2                                                  |
|      | July 14, 2016      |                         | 0.6                                                        | 0.1                                                        | -1.9                                                   | -7.0                                                   |
|      | August 11, 2016    |                         | 0.1                                                        | 0.1                                                        | -3.4                                                   | -5.8                                                   |
|      | September 2, 2016  |                         | 1.4                                                        | 0.1                                                        | n.d.                                                   | n.d.                                                   |
|      | October 1, 2016    |                         | 0.1                                                        | 0.1                                                        | -3.9                                                   | -5.5                                                   |
|      | November 3, 2016   |                         | 0.1                                                        | 0.1                                                        | -8.5                                                   | -9.5                                                   |
|      | November 30, 2016  |                         | 0.2                                                        | 0.1                                                        | -2.6                                                   | -5.3                                                   |
|      | January 4, 2017    |                         | 0.1                                                        | 0.1                                                        | -6.0                                                   | -4.9                                                   |
|      | February 1, 2017   |                         | 0.7                                                        | 6.2                                                        | -6.1                                                   | -3.7                                                   |
|      | March 2, 2017      |                         | 0.6                                                        | 4.4                                                        | -7.4                                                   | -4.5                                                   |
|      | March 31, 2017     |                         | 1.7                                                        | 5.3                                                        | -8.7                                                   | -5.8                                                   |
|      | July 15, 2019      |                         | 0.7                                                        | 0.9                                                        | -0.7                                                   | -1.5                                                   |
|      | August 12, 2019    |                         | 0.4                                                        | 0.9                                                        | -1.2                                                   | -5.8                                                   |
|      | September 12, 2019 |                         | 0.3                                                        | 0.9                                                        | -5.0                                                   | -7.5                                                   |
|      | October 16, 2019   |                         | 0.4                                                        | 0.9                                                        | -2.1                                                   | -5.1                                                   |
|      | July 15, 2019      | throughfall             | 1.0                                                        | 2.1                                                        | -5.4                                                   | -4.6                                                   |
|      | August 12, 2019    |                         | 2.5                                                        | 2.5                                                        | -1.4                                                   | -3.6                                                   |
|      | September 12, 2019 |                         | 2.3                                                        | 1.5                                                        | -2.7                                                   | -4.7                                                   |
|      | October 16, 2019   |                         | 0.5                                                        | 0.5                                                        | -3.2                                                   | -3.7                                                   |



| Site | Date               | Sample type             | [NH <sub>4</sub> <sup>+</sup> -N]<br>(mg L <sup>-1</sup> ) | [NO <sub>3</sub> <sup>-</sup> -N]<br>(mg L <sup>-1</sup> ) | δ <sup>15</sup> NH <sub>4</sub> <sup>+</sup> -N<br>(‰) | δ <sup>15</sup> NO <sub>3</sub> <sup>-</sup> -N<br>(‰) |
|------|--------------------|-------------------------|------------------------------------------------------------|------------------------------------------------------------|--------------------------------------------------------|--------------------------------------------------------|
|      | June 6, 2019       | runoff                  | 0.2                                                        | 1.5                                                        | -7.4                                                   | -7.4                                                   |
|      | August 12, 2019    |                         | 0.1                                                        | 0.3                                                        | -4.0                                                   | -3.4                                                   |
|      | September 12, 2019 |                         | 0.1                                                        | 0.4                                                        | -5.3                                                   | -4.2                                                   |
|      | June 6, 2019       | bog water               | 1.2                                                        | 0.8                                                        | 3.6                                                    | 1.9                                                    |
|      | June 6, 2019       |                         | 0.5                                                        | 1.5                                                        | 2.9                                                    | 1.9                                                    |
|      | June 6, 2019       |                         | 1.8                                                        | 1.1                                                        | 3.3                                                    | 2.1                                                    |
|      | June 6, 2019       |                         | 2.3                                                        | 1.7                                                        | 1.6                                                    | 0.3                                                    |
|      | June 6, 2019       |                         | 0.5                                                        | 1.3                                                        | 1.5                                                    | -0.9                                                   |
| MMJ  | January 22, 2016   | open-area precipitation | 1.2                                                        | 6.6                                                        | -10.9                                                  | -3.8                                                   |
|      | February 5, 2016   |                         | 1.1                                                        | 0.9                                                        | -6.1                                                   | -7.9                                                   |
|      | March 4, 2016      |                         | 0.1                                                        | 0.4                                                        | -10.2                                                  | -4.3                                                   |
|      | April 4, 2016      |                         | 1.1                                                        | 6.6                                                        | -9.6                                                   | -6.4                                                   |
|      | May 3, 2016        |                         | 1.1                                                        | 0.4                                                        | -8.3                                                   | -10.2                                                  |
|      | June 8, 2016       |                         | 0.8                                                        | 0.1                                                        | -1.9                                                   | -4.4                                                   |
|      | July 1, 2016       |                         | 0.7                                                        | 0.1                                                        | 6.2                                                    | 0.7                                                    |
|      | August 5, 2016     |                         | 0.8                                                        | 0.1                                                        | 8.0                                                    | 1.2                                                    |
|      | September 10, 2016 |                         | 0.1                                                        | 0.1                                                        | 7.4                                                    | 1.9                                                    |
|      | October 10, 2016   |                         | 0.5                                                        | 0.1                                                        | -2.3                                                   | -4.6                                                   |
|      | November 7, 2016   |                         | 0.4                                                        | 0.1                                                        | -2.0                                                   | -4.6                                                   |
|      | December 6, 2016   |                         | 0.2                                                        | 0.1                                                        | -4.7                                                   | -6.6                                                   |
|      | January 10, 2017   |                         | 0.4                                                        | 3.3                                                        | -3.6                                                   | -2.2                                                   |
|      | February 10, 2017  |                         | 0.9                                                        | 6.2                                                        | -10.7                                                  | -4.9                                                   |
|      | March 3, 2017      |                         | 0.8                                                        | 6.5                                                        | -12.0                                                  | -6.5                                                   |
|      | April 10, 2017     |                         | 1.2                                                        | 1.2                                                        | -0.3                                                   | -2.7                                                   |
|      | May 5, 2017        |                         | 0.9                                                        | 3.1                                                        | -9.1                                                   | -8.0                                                   |
|      | June 8, 2017       |                         | 0.9                                                        | 0.0                                                        | 1.1                                                    | -5.0                                                   |
|      | July 10, 2017      |                         | 0.9                                                        | 0.0                                                        | -0.9                                                   | -1.8                                                   |
|      | August 10, 2017    |                         | 0.2                                                        | 0.0                                                        | -1.7                                                   | -5.8                                                   |
|      | September 5, 2017  |                         | 0.3                                                        | 4.9                                                        | -1.7                                                   | -0.3                                                   |
|      | April 10, 2017     | throughfall             | 2.0                                                        | 3.5                                                        | -14.7                                                  | -3.8                                                   |
|      | May 5, 2017        |                         | 1.4                                                        | 1.4                                                        | -14.8                                                  | -13.4                                                  |
|      | June 8, 2017       |                         | 2.1                                                        | 0.0                                                        | -3.8                                                   | -4.0                                                   |
|      | July 10, 2017      |                         | 3.9                                                        | 1.8                                                        | -1.1                                                   | n.d.                                                   |
|      | August 10, 2017    |                         | 2.9                                                        | 1.8                                                        | -2.8                                                   | -4.4                                                   |
|      | September 5, 2017  |                         | 0.8                                                        | 1.8                                                        | -2.2                                                   | -4.5                                                   |
|      | June 3, 2019       | runoff                  | 0.1                                                        | 0.2                                                        | -5.9                                                   | -4.3                                                   |
|      | June 3, 2019       | bog water               | n.d.                                                       | n.d.                                                       | n.d.                                                   | n.d.                                                   |
|      | June 3, 2019       |                         | 0.0                                                        | 0.0                                                        | -0.3                                                   | -2.9                                                   |
|      | June 3, 2019       |                         | 1.3                                                        | 1.0                                                        | -2.4                                                   | -2.8                                                   |
|      | June 3, 2019       |                         | 2.0                                                        | 1.0                                                        | -1.4                                                   | -2.6                                                   |
|      | June 3, 2019       |                         | 2.2                                                        | 2.7                                                        | -1.4                                                   | -1.7                                                   |

Table S3. Comparison of concentrations of major chemical species in atmospheric deposition, surface runoff and bog water at the study sites. N : P ratios of atmospheric input are based on vertical wet deposition. Data from October 2018.

| Site | Sample type             | NH <sub>4</sub> <sup>+</sup> | Na <sup>+</sup> | Mg <sup>2+</sup> | K <sup>+</sup> | Ca <sup>2+</sup>   | Mn <sup>2+</sup> | Fe <sub>tot</sub> | (HCO <sub>3</sub> ) <sup>-</sup> | (NO <sub>3</sub> ) <sup>-</sup> | F <sup>-</sup> | (SO <sub>4</sub> ) <sup>2-</sup> | Cl <sup>-</sup>    | DOC  | TON  | P <sub>tot</sub> | N:P  | pH   | Conductivity (μS cm <sup>-1</sup> ) |
|------|-------------------------|------------------------------|-----------------|------------------|----------------|--------------------|------------------|-------------------|----------------------------------|---------------------------------|----------------|----------------------------------|--------------------|------|------|------------------|------|------|-------------------------------------|
|      |                         | mg L <sup>-1</sup>           |                 |                  |                | μg L <sup>-1</sup> |                  |                   | mg L <sup>-1</sup>               |                                 |                |                                  | μg L <sup>-1</sup> |      |      |                  |      |      |                                     |
| BRU  | Atmospheric deposition* | 0.33                         | 0.15            | 0.05             | 0.07           | 0.15               | < 5.0            | < 0.05            | < 0.5                            | 0.86                            | < 0.02         | 0.76                             | 0.27               | 0.38 | 0.07 | < 6.0            | 169  | 5.46 | < 8.00                              |
|      | Bog water               | 2.09                         | 1.68            | 0.73             | 1.85           | 1.90               | 13.0             | 0.64              | 15.3                             | 0.31                            | 0.04           | 6.01                             | 3.92               | 79.7 | 2.31 | 165              | 23.8 | 4.31 | 74.6                                |
|      | Surface runoff          | 0.64                         | 3.25            | 0.39             | 1.36           | 2.00               | 786              | 0.67              | 9.2                              | 0.75                            | 0.05           | 8.86                             | 1.42               | 2.50 | 0.21 | 29.4             | 29.3 | 6.26 | 44.6                                |
| UHL  | Atmospheric deposition  | 0.14                         | 0.51            | 0.07             | 0.10           | 0.24               | 16.0             | < 0.05            | < 0.5                            | 1.22                            | < 0.02         | 1.07                             | 0.78               | 0.75 | 0.17 | 9.3              | 60.1 | 4.97 | 12.9                                |
|      | Bog water               | 0.27                         | 3.60            | 1.98             | 9.05           | 7.75               | 216              | 2.95              | 12.2                             | < 0.10                          | 0.18           | 47.4                             | 1.96               | 66.6 | 3.48 | 490              | 7.6  | 4.02 | 165                                 |
|      | Surface runoff          | 0.04                         | 3.22            | 1.71             | 0.47           | 7.72               | 567              | 0.96              | 2.4                              | < 0.10                          | 0.19           | 33.7                             | 1.21               | 4.45 | 0.18 | 40.2             | 5.5  | 4.48 | 98.3                                |
| MMJ  | Atmospheric deposition  | 0.84                         | 0.52            | 0.15             | 0.19           | 0.62               | 10.0             | < 0.05            | < 0.5                            | 3.97                            | < 0.02         | 2.30                             | 0.68               | 1.50 | 0.20 | 15.5             | 112  | 6.37 | 24.5                                |
|      | Bog water               | 1.56                         | 1.01            | 0.16             | 1.97           | 0.53               | 9.0              | 0.36              | 9.2                              | 0.39                            | 0.04           | 0.69                             | 2.20               | 46.9 | 1.33 | 172              | 15.0 | 4.88 | 41.6                                |
|      | Surface runoff          | 0.27                         | 2.64            | 2.71             | 1.81           | 31.1               | 164              | 0.37              | 110                              | 1.23                            | 0.05           | 6.17                             | 3.27               | 6.11 | 0.12 | 12.4             | 48.4 | 7.40 | 190                                 |

\*open-area precipitation

Table S4. Chemical characteristics and  $\delta^{15}\text{N}$  values of peat core samples.

| Site | Depth (cm) | Na<br>(mg kg <sup>-1</sup> ) | K<br>(g kg <sup>-1</sup> ) | Mg<br>(mg kg <sup>-1</sup> ) | Ca<br>(g kg <sup>-1</sup> ) | C<br>(%) | N<br>(%) | P<br>(%) | N:P   | Ash content<br>(%) | Density<br>(g cm <sup>-3</sup> ) | $\delta^{15}\text{N}$<br>(‰) |
|------|------------|------------------------------|----------------------------|------------------------------|-----------------------------|----------|----------|----------|-------|--------------------|----------------------------------|------------------------------|
| BRU  | -1         | 391                          | 2.73                       | 397                          | 1.19                        | 43.5     | 0.86     | 0.03     | 30.8  | 1.70               | 0.04                             | -4.51                        |
|      | -3         | 448                          | 2.24                       | 394                          | 1.27                        | 43.8     | 1.25     | 0.02     | 32.2  | 1.39               | 0.03                             | -4.11                        |
|      | -5         | 464                          | 1.64                       | 362                          | 1.08                        | 46.5     | 1.36     | 0.03     | 30.3  | 1.26               | 0.04                             | -3.67                        |
|      | -7         | 207                          | 0.77                       | 320                          | 1.01                        | 45.1     | 1.32     | 0.04     | 19.7  | 1.34               | 0.05                             | -2.73                        |
|      | -9         | 190                          | 0.47                       | 314                          | 0.99                        | 44.5     | 1.26     | 0.04     | 19.3  | 1.58               | 0.05                             | -2.35                        |
|      | -11        | 162                          | 0.38                       | 358                          | 1.15                        | 44.8     | 1.05     | 0.04     | 20.1  | 1.30               | 0.06                             | -2.52                        |
|      | -13        | 164                          | 0.19                       | 228                          | 0.74                        | 44.7     | 1.02     | 0.04     | 21.1  | 1.21               | 0.06                             | -2.53                        |
|      | -15        | 247                          | 0.27                       | 242                          | 0.80                        | 45.2     | 0.98     | 0.03     | 27.2  | 1.41               | 0.06                             | -1.97                        |
|      | -17        | 257                          | 0.60                       | 285                          | 0.64                        | 44.2     | 1.17     | 0.05     | 27.5  | 4.42               | 0.08                             | -1.74                        |
|      | -19        | 173                          | 0.30                       | 207                          | 0.64                        | 46.8     | 1.18     | 0.04     | 27.8  | 2.74               | 0.07                             | -1.37                        |
|      | -21        | 467                          | 1.17                       | 263                          | 0.72                        | 46.0     | 1.34     | 0.04     | 37.3  | 8.50               | 0.12                             | -1.53                        |
|      | -23        | 197                          | 0.37                       | 200                          | 0.90                        | 53.1     | 1.43     | 0.03     | 42.7  | 2.76               | 0.10                             | -1.74                        |
|      | -25        | 155                          | 0.16                       | 188                          | 0.94                        | 49.0     | 1.48     | 0.03     | 41.4  | 1.00               | 0.09                             | -1.83                        |
|      | -27        | 256                          | 0.15                       | 221                          | 1.04                        | 46.6     | 1.66     | 0.03     | 37.7  | 1.46               | 0.10                             | -1.58                        |
| -29  | 142        | 0.18                         | 249                        | 1.09                         | 47.8                        | 1.58     | 0.03     | 39.5     | 1.41  | 0.10               | -1.94                            |                              |
| UHL  | -1         | 262                          | 2.14                       | 455                          | 1.62                        | 41.9     | 0.90     | 0.07     | 12.1  | 4.55               | 0.03                             | -2.69                        |
|      | -3         | 226                          | 1.06                       | 475                          | 1.96                        | 41.4     | 0.76     | 0.10     | 12.2  | 6.48               | 0.03                             | -1.93                        |
|      | -5         | 261                          | 0.82                       | 452                          | 2.02                        | 41.7     | 0.78     | 0.10     | 13.0  | 5.35               | 0.05                             | -1.37                        |
|      | -7         | 319                          | 0.73                       | 444                          | 1.99                        | 42.2     | 0.74     | 0.11     | 11.8  | 5.20               | 0.06                             | -1.04                        |
|      | -9         | 243                          | 0.48                       | 394                          | 1.90                        | 42.1     | 0.79     | 0.11     | 11.3  | 5.65               | 0.06                             | -0.62                        |
|      | -11        | 193                          | 0.40                       | 418                          | 2.29                        | 41.5     | 0.86     | 0.10     | 10.9  | 5.37               | 0.05                             | -0.31                        |
|      | -13        | 247                          | 0.44                       | 426                          | 2.22                        | 41.8     | 0.81     | 0.09     | 11.5  | 4.88               | 0.04                             | -0.18                        |
|      | -15        | 249                          | 0.35                       | 415                          | 2.13                        | 38.5     | 0.95     | 0.09     | 11.3  | 5.32               | 0.06                             | 0.08                         |
|      | -17        | 222                          | 0.43                       | 370                          | 1.67                        | 42.8     | 1.32     | 0.09     | 13.0  | 7.48               | 0.08                             | 0.38                         |
|      | -19        | 236                          | 0.43                       | 361                          | 1.59                        | 41.3     | 1.03     | 0.09     | 12.8  | 8.05               | 0.08                             | 0.42                         |
|      | -21        | 292                          | 0.61                       | 434                          | 1.56                        | 39.8     | 1.61     | 0.10     | 13.3  | 10.91              | 0.11                             | 0.09                         |
|      | -23        | 310                          | 0.89                       | 538                          | 1.57                        | 40.4     | 1.36     | 0.11     | 13.1  | 15.54              | 0.11                             | 0.32                         |
|      | -25        | 468                          | 1.77                       | 821                          | 1.50                        | 33.8     | 1.23     | 0.12     | 12.7  | 29.40              | 0.10                             | 0.33                         |
|      | -27        | 385                          | 1.55                       | 713                          | 1.44                        | 35.3     | 1.07     | 0.11     | 14.8  | 28.13              | 0.13                             | 0.23                         |
| -29  | 424        | 1.53                         | 641                        | 1.43                         | 34.0                        | 1.07     | 0.12     | 13.3     | 29.25 | 0.18               | 0.78                             |                              |
| MMJ  | -1         | 519                          | 5.50                       | 335                          | 0.67                        | 43.0     | 0.58     | 0.08     | 7.0   | 1.16               | 0.04                             | -3.54                        |

| Site | Depth (cm) | Na<br>(mg kg <sup>-1</sup> ) | K<br>(g kg <sup>-1</sup> ) | Mg<br>(mg kg <sup>-1</sup> ) | Ca<br>(g kg <sup>-1</sup> ) | C<br>(%) | N<br>(%) | P<br>(%) | N:P  | Ash content<br>(%) | Density<br>(g cm <sup>-3</sup> ) | δ <sup>15</sup> N<br>(‰) |
|------|------------|------------------------------|----------------------------|------------------------------|-----------------------------|----------|----------|----------|------|--------------------|----------------------------------|--------------------------|
|      | -3         | 357                          | 1.65                       | 359                          | 0.93                        | 42.7     | 0.42     | 0.06     | 7.2  | 1.18               | 0.04                             | -2.07                    |
|      | -5         | 191                          | 0.43                       | 257                          | 1.06                        | 42.6     | 0.52     | 0.06     | 8.3  | 1.16               | 0.04                             | -2.01                    |
|      | -7         | 150                          | 0.31                       | 223                          | 1.02                        | 43.3     | 0.60     | 0.05     | 11.2 | 1.09               | 0.04                             | -1.94                    |
|      | -9         | 124                          | 0.28                       | 258                          | 1.10                        | 43.4     | 0.71     | 0.07     | 10.6 | 1.57               | 0.05                             | -2.23                    |
|      | -11        | 73.1                         | 0.22                       | 226                          | 1.08                        | 43.5     | 0.69     | 0.05     | 13.1 | 1.09               | 0.05                             | -2.20                    |
|      | -13        | 71.4                         | 0.17                       | 228                          | 1.09                        | 44.6     | 0.72     | 0.05     | 15.7 | 1.46               | 0.05                             | -2.08                    |
|      | -15        | 69.3                         | 0.20                       | 226                          | 1.12                        | 44.2     | 0.96     | 0.05     | 17.9 | 2.70               | 0.06                             | -1.87                    |
|      | -17        | 122                          | 0.18                       | 231                          | 1.08                        | 44.0     | 1.08     | 0.06     | 17.8 | 1.81               | 0.06                             | -1.65                    |
|      | -19        | 103                          | 0.15                       | 231                          | 1.15                        | 44.6     | 1.19     | 0.06     | 18.8 | 2.16               | 0.05                             | -1.63                    |
|      | -21        | 170                          | 0.25                       | 239                          | 1.22                        | 41.7     | 1.63     | 0.08     | 21.6 | 3.15               | 0.04                             | -1.80                    |
|      | -23        | 136                          | 0.24                       | 221                          | 1.25                        | 46.2     | 1.45     | 0.07     | 21.9 | 2.90               | 0.05                             | -1.22                    |
|      | -25        | 114                          | 0.25                       | 214                          | 1.32                        | 48.8     | 1.18     | 0.06     | 21.0 | 2.54               | 0.05                             | -1.39                    |
|      | -27        | 126                          | 0.24                       | 214                          | 1.48                        | 46.0     | 1.12     | 0.05     | 20.5 | 2.39               | 0.06                             | -1.72                    |
|      | -29        | 136                          | 0.34                       | 217                          | 1.56                        | 45.1     | 1.15     | 0.06     | 18.3 | 3.25               | 0.05                             | -1.75                    |

Table S5. Rates of biological N<sub>2</sub>-fixation (BNF) in pristine and polluted *Sphagnum* bogs compiled from recent literature. ARA – acetylene reduction assay.

| Reference                  | Estimated atmospheric deposition of N <sub>r</sub> (g ha <sup>-1</sup> yr <sup>-1</sup> ) | Mean BNF rate (mg N m <sup>-2</sup> d <sup>-1</sup> ) | Minimum and maximum BNF rates (mg N m <sup>-2</sup> d <sup>-1</sup> ) | Method of measurement                          | Site details                         |                                                                                                                                              |
|----------------------------|-------------------------------------------------------------------------------------------|-------------------------------------------------------|-----------------------------------------------------------------------|------------------------------------------------|--------------------------------------|----------------------------------------------------------------------------------------------------------------------------------------------|
|                            |                                                                                           |                                                       |                                                                       |                                                | Location                             | <i>Sphagnum</i> species/diazotrophs                                                                                                          |
| Stuart et al., 2021        | < 2                                                                                       | 0.80                                                  | 0-3.2                                                                 | <sup>15</sup> N <sub>2</sub> assimilation      | Alaska, USA                          | <i>Sphagnum</i> spp.                                                                                                                         |
| Vile et al., 2014          | 0.8-2.0                                                                                   | 18.4                                                  | 3.43-44.5                                                             | <sup>15</sup> N <sub>2</sub> assimilation, ARA | Alberta, Canada                      | Methanotrophs associated with <i>Sphagnum</i>                                                                                                |
| Knorr et al., 2015         |                                                                                           | 90.6                                                  | 27-216                                                                | <sup>15</sup> N <sub>2</sub> assimilation, ARA | southern Patagonia, Chile            | <i>Sphagnum magellanicum</i>                                                                                                                 |
| Saiz et al., 2021          | 2                                                                                         | 0.15                                                  |                                                                       | <sup>15</sup> N <sub>2</sub> assimilation      | Sweden                               | <i>S. majus</i> , <i>S. balticum</i> ,<br><i>S. fuscum</i> , <i>S. papillosum</i>                                                            |
| Patova et al., 2020        | 2.7                                                                                       |                                                       | 10-23.3                                                               | ARA                                            | Russia                               | <i>Sphagnum</i> associated cyanobacteria                                                                                                     |
| van den Elzen et al., 2020 | 6                                                                                         | 0.03                                                  |                                                                       | <sup>15</sup> N <sub>2</sub> assimilation      | southern Sweden                      | <i>S. capillifolium</i> subsp. <i>rubellum</i> /<br><i>S. fuscum</i>                                                                         |
| Saiz et al., 2021          | 6                                                                                         | 0.07                                                  |                                                                       | <sup>15</sup> N <sub>2</sub> assimilation      | Scotland                             | <i>S. cuspidatum</i> , <i>S. falax</i> ,<br><i>S. capillifolium</i> , <i>S. papillosum</i>                                                   |
| Chapman and Hemond, 1982   | 7                                                                                         | 6.67                                                  |                                                                       | <sup>15</sup> N <sub>2</sub> assimilation, ARA | Massachusetts, USA                   | <i>Sphagnum</i> spp.                                                                                                                         |
| Zivkovic et al., 2022      | 8.0-10.0                                                                                  | 1.57                                                  |                                                                       | ARA                                            | Ontario, Canada                      | <i>S. fallax</i> , <i>S. angustifolium</i> ,<br><i>S. capillifolium</i> , <i>S. divinum</i> ,<br><i>S. medium</i> ( <i>s. magellanicum</i> ) |
| Urban and Eisenreich, 1988 | 10.4                                                                                      |                                                       | 0.4-0.56                                                              | ARA                                            | Minnesota, USA                       | <i>Sphagnum</i> spp.                                                                                                                         |
| Warren et al., 2017        | 10.4                                                                                      | 54.8                                                  |                                                                       | <sup>15</sup> N <sub>2</sub> assimilation, ARA | Minnesota, USA                       | <i>S. fallax</i> , <i>S. angustifolium</i>                                                                                                   |
| Rousk et al., 2018         | 15                                                                                        | < 2.3                                                 |                                                                       | ARA                                            | Copenhagen, Denmark                  | <i>Sphagnum</i> spp.                                                                                                                         |
| Saiz et al., 2021          | 17                                                                                        | 0.05                                                  |                                                                       | <sup>15</sup> N <sub>2</sub> assimilation      | Wales                                | <i>S. cuspidatum</i> , <i>S. falax</i> ,<br><i>S. capillifolium</i> , <i>S. papillosum</i>                                                   |
| this study                 | 18.6*                                                                                     | 8.22                                                  |                                                                       | <sup>15</sup> N <sub>2</sub> assimilation      | Male Mechove jezirko, Czech Republic | <i>S. girgensohnii</i> Russow                                                                                                                |

| Reference                          | Estimated atmospheric deposition of N <sub>r</sub> (g ha <sup>-1</sup> yr <sup>-1</sup> ) | Mean BNF rate (mg N m <sup>-2</sup> d <sup>-1</sup> ) | Minimum and maximum BNF rates (mg N m <sup>-2</sup> d <sup>-1</sup> ) | Method of measurement                     | Site details |                                                                                            |
|------------------------------------|-------------------------------------------------------------------------------------------|-------------------------------------------------------|-----------------------------------------------------------------------|-------------------------------------------|--------------|--------------------------------------------------------------------------------------------|
|                                    |                                                                                           |                                                       |                                                                       |                                           | Location     | <i>Sphagnum</i> species/diazotrophs                                                        |
| van den Elzen <i>et al.</i> , 2017 | 25                                                                                        | 2.4                                                   |                                                                       | <sup>15</sup> N <sub>2</sub> assimilation | Netherlands  | <i>S. palustre</i> , <i>S. squarrosum</i>                                                  |
| Saiz <i>et al.</i> , 2021          | 27                                                                                        | 0.03                                                  |                                                                       | <sup>15</sup> N <sub>2</sub> assimilation | England      | <i>S. cuspidatum</i> , <i>S. falax</i> ,<br><i>S. capillifolium</i> , <i>S. papillosum</i> |

\*including horizontal deposition

## Supplement

### Methodology of chemical analysis of liquid samples

Concentrations of  $\text{Na}^+$ ,  $\text{K}^+$ ,  $\text{Ca}^{2+}$ ,  $\text{Mg}^{2+}$ ,  $\text{Mn}^{2+}$ , and  $\text{Fe}_{\text{tot}}$  were measured by flame atomic absorption spectrometry (FAAS; AAnalyst 100, PerkinElmer) with the limits of quantification (LOQ) of  $0.01 \text{ mg L}^{-1}$  and  $0.005 \text{ mg L}^{-1}$  for Fe. Concentrations of  $\text{NH}_4^+$  and  $\text{P}_{\text{tot}}$  were determined spectrophotometrically (PMT; Perkin-Elmer Lambda 25; LOQ of  $0.02$  and  $0.006 \text{ mg L}^{-1}$ , respectively). Concentrations of  $\text{Cl}^-$ ,  $\text{SO}_4^{2-}$  and  $\text{NO}_3^-$  were determined by ion chromatography (HPLC; Knauer 1000; LOQ of  $0.15$ ,  $0.5$ , and  $0.3 \text{ mg L}^{-1}$ , respectively). Concentrations of  $\text{F}^-$  were measured potentiometrically (ION 85 Radiometer Inc.;  $0.02 \text{ mg L}^{-1}$ ). Concentrations of  $\text{HCO}_3^-$  were measured by titration (LOQ of  $0.6 \text{ mg L}^{-1}$ ). Dissolved organic carbon (DOC) and total dissolved nitrogen (TN) were determined on an Apollo 9000 analyzer (Tekmar-Dohrmann; LOQ of  $0.1$  and  $0.5 \text{ mg L}^{-1}$ ). Measurement of pH was carried out on PHM-62 Radiometer, and conductivity on CDM-83 Radiometer Denmark.

### Methodology of chemical analysis of solid samples

Ash content in peat was determined on a  $0.5 \text{ g}$  aliquot at  $550 \text{ }^\circ\text{C}$ . Concentrations of Na, Mg, K, and Ca were measured by flame atomic absorption spectrometry (FAAS; AAnalyst 100, PerkinElmer) with the limits of quantification (LOQ) of  $50 \text{ ppm}$ . Phosphorus content was determined spectrophotometrically (P-E Hitachi 200; LOQ of  $50 \text{ ppm}$ ). A  $10\text{-mg}$  aliquot of each homogenized peat sample was placed in a tin capsule and combusted in a Fisons 1108 elemental analyzer at  $1040 \text{ }^\circ\text{C}$ . Carbon concentrations in peat were determined with a reproducibility of  $1.0 \%$ .
